# Supplementary material
Source: PubMed Central journal article supplement (PMC3075135)
Supplement: supp_japplphysiol.01261.2010_suppmat.pdf [file supp_japplphysiol.01261.2010_suppmat.pdf]

# 1 Appendix

## 2 Concept of the Modelflow aortic age:

3 Langewouters et al have demonstrated a strong linear relationship between parameters of an  
4 arctangent model of human aortic pressure-area relationship vs. chronological age (1, 2). With  
5 this arctangent model of the aortic pressure-area relationship, Wesseling et al established the  
6 mathematical approach to compute aortic input impedance via a non-linear, time-varying, three-  
7 element Windkessel Model (3). Thus, this mathematically generated aortic input impedance is  
8 determined by chronological age, while aortic input impedance characterizes a dynamic  
9 relationship between aortic blood flow and pressure, and thus estimates stroke volume as an  
10 integration of aortic flow from any given arterial pressure waveforms (3). As a consequence,  
11 stroke volume is estimated from subject chronological age and any given arterial pressure  
12 waveform via the mathematical Windkessel model of aortic input impedance. This entire process  
13 is called the Modelflow system (Fig. A).

14 The critical point for the concept of the Modelflow aortic age is the fact that in the  
15 Modelflow system the estimated stroke volume (SV) can be considered as a function of subject  
16 age (Age) once arterial pressure waveforms are given, while the function itself is determined by  
17 the shape and value of the arterial pressure waveform;  $SV=F(\text{Age})$  (Fig. B). If each SV value  
18 corresponds to exactly one Age value, the function is invertible;  $\text{Age}=F^{-1}(SV)$ , and thus the  
19 Modelflow aortic age can be generated from stroke volume. In order to confirm a one-to-one  
20 relationship between Modelflow Age vs. SV, the Modelflow Age-SV relationships were plotted  
21 across a variety of arterial pressure waveforms obtained from young and elderly individuals  
22 including those during lower body negative pressures with Modelflow Age ranging 20-90 yrs.  
23 We found a strong negative linear relationship between the Modelflow Age and SV ( $SV=-$

24  $a \cdot \text{Age} + b$ ,  $a, b > 0$ ) for all arterial pressure waveforms. One representative relationship curve is  
25 shown in Fig. C. This result suggests that the linear relationship is universal at least in a healthy  
26 population while the slopes are individually different dependent on each arterial pressure  
27 waveform profile. This negative linear relationship implicates that as the Modelflow aortic age  
28 increases, that is, the aorta becomes stiffer, the Modelflow stroke volume becomes smaller at a  
29 given arterial pressure waveform. In the present study, the Modelflow aortic age was estimated  
30 by an inverse function, which was derived from each arterial pressure waveform, with an  
31 independent variable of stroke volume measured by the thermodilution;

$$32 \quad \text{Modelflow aortic age} = (b - \text{SV})/a \quad a, b > 0$$

33 Conceptually, the Modelflow aortic age is the age which provides the aortic input impedance  
34 that best characterizes the dynamic relationship between measured aortic flow (i.e. stroke  
35 volume) and pressure waveform. The key difference between Modelflow stroke volume vs.  
36 aortic age estimation is that stroke volume calculation requires chronological age (true age)  
37 while aortic age calculation requires measured stroke volume (true stroke volume) at any given  
38 arterial pressure waveforms (Fig C).

39

40

41

42 **References**

- 43 1. **Langewouters GJ, Wesseling KH, and Goedhard WJ.** The pressure  
44 dependent dynamic elasticity of 35 thoracic and 16 abdominal human aortas in vitro  
45 described by a five component model. *Journal of biomechanics* 18: 613-620, 1985.
- 46 2. **Langewouters GJ, Wesseling KH, and Goedhard WJ.** The static elastic  
47 properties of 45 human thoracic and 20 abdominal aortas in vitro and the parameters of  
48 a new model. *Journal of biomechanics* 17: 425-435, 1984.
- 49 3. **Wesseling KH, Jansen JR, Settels JJ, and Schreuder JJ.** Computation of  
50 aortic flow from pressure in humans using a nonlinear, three-element model. *J Appl*  
51 *Physiol* 74: 2566-2573, 1993.
- 52  
53  
54

55 **Figure A:** The Schematic explanation for the Modelflow system to estimate ascending aortic  
56 flow and stroke volume. This system uses the aortic pressure-area relationship estimated from  
57 chronological age with the known age-related changes in the aortic properties. Nonlinear, time-  
58 varying three elements Windkessel Model generates aortic input impedance which estimates  
59 ascending aortic flow and thus stroke volume from the arterial waveforms. To summarize, the  
60 Modelflow system generates stroke volume as an output signal from arterial pressure waveform  
61 and chronological age as input signals.

62

63 **Figure B:** The Schematic explanation for the Modelflow system to estimate Modelflow aortic  
64 age. The Modelflow system generates “aortic age” as an output signal from arterial pressure  
65 waveform and directly measured stroke volume as input signals.

66

67 **Figure C:** One representative data for the relationship between Modelflow stroke volume and  
68 aortic age from one sedentary elderly subject. As seen in the figure, a strong linear relationship  
69 exists between Modelflow stroke volume and aortic age. Dot arrows show the pathway to  
70 estimate stroke volume from the chronological (true) age with given arterial waveform while  
71 straight arrows show the pathway to estimate aortic age from the measured (true) stroke volume.  
72 If the dot and straight lines are identical, it means that the Modelflow aortic age is equivalent to  
73 subject’s chronological age, which consequently promises accurate stroke volume estimation  
74 with the Modelflow system.

75

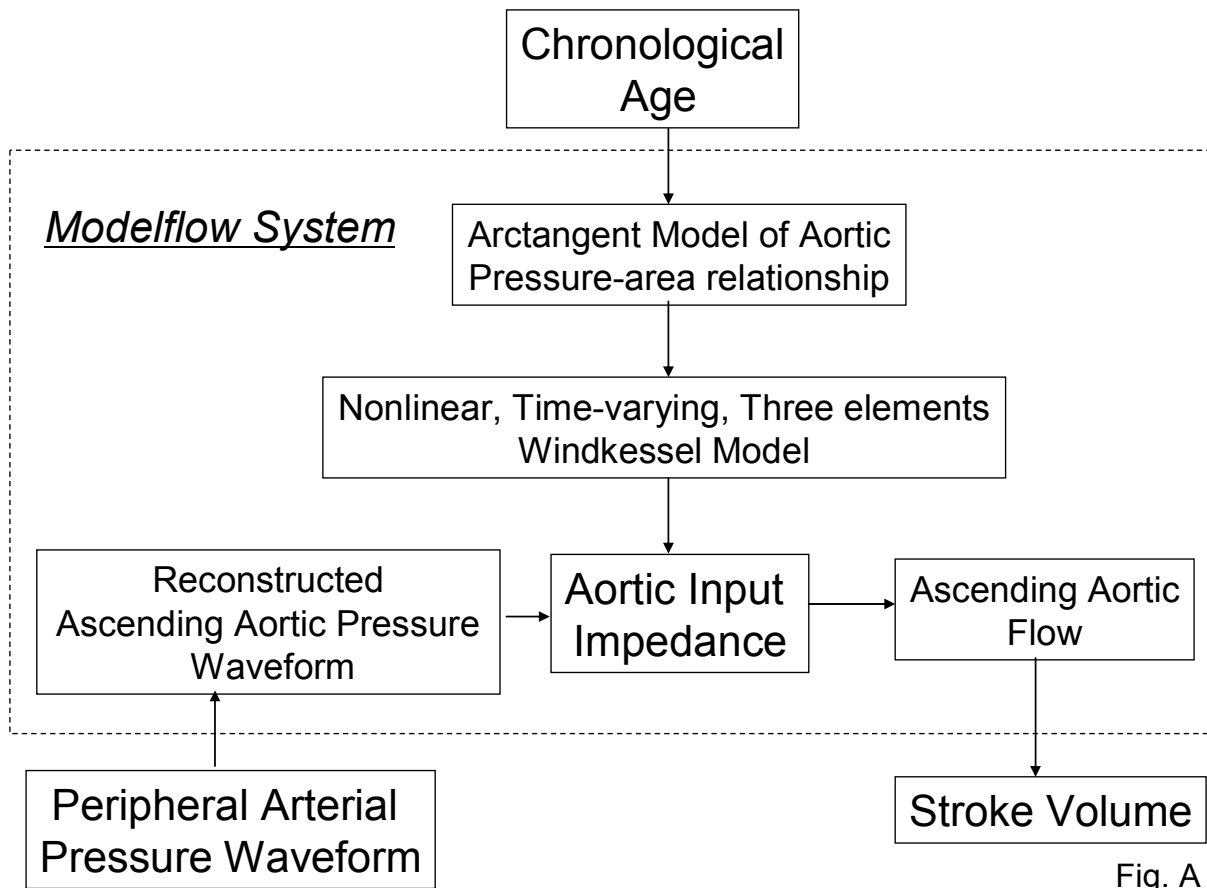

Fig. A

76  
77  
78  
79

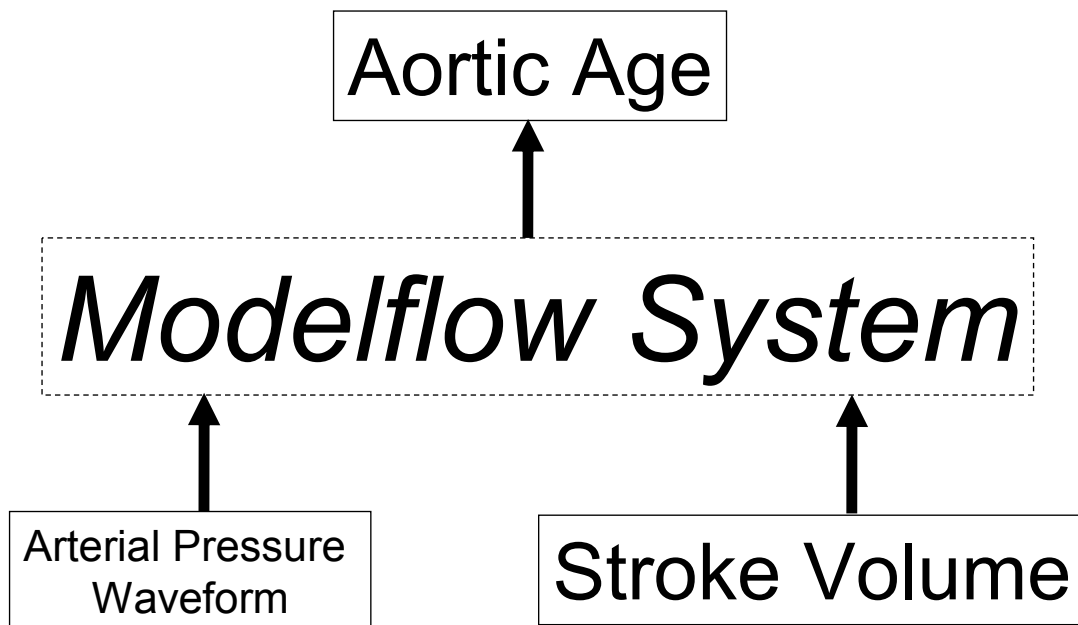

Fig. B

80  
81  
82

# Modelflow Aortic Age-SV Relationship

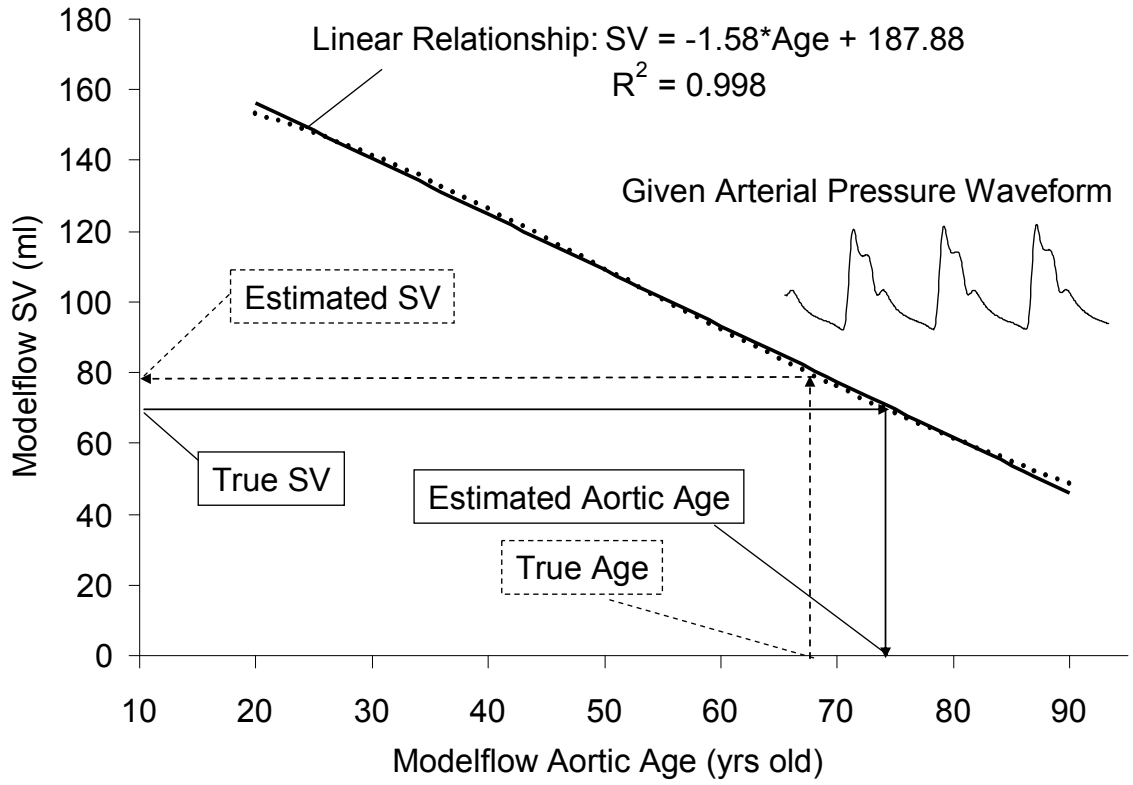

Fig. C

83  
84
